# Supplementary material
Source: Research Square preprint supplement (doi:10.21203/rs.3.rs-9350156/v1)
Supplement: Supplementary file 1 [file 48bc26f21f004d91d5ba31e2.xlsx]

## Sheet: Sheet1
Table 1. Relations between TERTp status and other progonostic factors
	Total(n = 112)	TERTp wild type(n = 42)	TERTp mutant(n = 70)	P
sex,female,n(%)	52(46.4)	20(47.6)	32(45.7)	0.848b
age,y,median(range)	66(29-89)	65(29-89)	66(42-85)	0.601a
preoperative KPS ≧ 80,n(%)	71(63.4)	20(47.6)	51(72.9)	0.009b
RANO class1,n(%)	2(1.8)	1(2.4)	1(1.4)	1b
class2A,n(%)	49(43.8)	14(33.3)	35(50.0)	0.115b
class2B,n(%)	27 (24.1)	12(28.6)	15(21.4)	0.494b
class3A,n(%)	20 (17.9)	11(26.2)	9(12.9)	0.125b
class3B,n(%)	14 (12.5)	4(9.5)	10(14.3)	0.564b
MGMT gene promotor methylation,n(%)	53(47.3)	21(50.0)	32(45.7)	0.699b
Ki-67 labeling index,mean(%)	38.0 ± 0.19	39±0.18	37 ± 0.20	0.418a
ATRX loss, n(%)	21(18.8)	14(33.3)	7(10.0)	0.005b
CNA PDGFR amp,n(%)	14(12.5)	9(21.4)	5(7.1)	0.038b
gain,n(%)	6(5.4)	4(9.5)	2(2.9)	0.195b
amp/gain,n(%)	20(17.9)	13(31.0)	7(10.0)	0.009b
EGFR amp,n(%)	32(28.6)	6(14.3)	26(37.1)	0.01b
gain,n(%)	37(33)	9(21.4)	28(40.0)	0.061b
amp/gain,n(%)	69(61.6)	15(35.7)	54(77.1)	<.001b
CDKN2A homo,n(%)	52(46.4)	19(45.2)	33(47.1)	1b
hemi,n(%)	23(20.5)	8(19.0)	15(21.4)	0.814b
deletion,n(%)	75(70.0)	26(61.9)	48(68.6)	0.681b
PTEN homo,n(%)	6(5.4)	1(2.4)	5(7.1)	0.407b
hemi,n(%)	42(37.5)	5(11.9)	37(52.9)	<.001b
deletion,n(%)	48(42.9)	6(14.3)	42(60.0)	<.001b
CDK4 amp,n(%)	10(8.9)	4(9.5)	6(8.6)	1b
gain,n(%)	8(7.1)	6(14.3)	2(2.9)	0.051b
amp/gain,n(%)	18(16.1)	10(23.8)	8(11.4)	0.111b
MDM2 amp,n(%)	13(11.6)	7(16.7)	6(8.6)	0.23b
gain,n(%)	5(4.5)	4(9.5)	1(1.4)	0.065b
amp/gain,n(%)	18(16.1)	11(26.2)	7(10.0)	0.033b
NFKBIA homo,n(%)	4(3.6)	2(4.8)	2(2.9)	0.63b
hemi,n(%)	14(12.5)	7(16.7)	7(10.0)	0.379b
deletion,n(%)	18(16.1)	9(21.4)	9(12.9)	0.29b
TP53 Hemi, n (%)	12(10.7)	9(21.4)	3(2.7)	0.009b
Amp, amplification; Hemi, hemizygous deletion; Homo, homozygous deletion; KPS, Karnofsky Performance Status.
P values <0.05 are in bold.
aMann-Whitney test
bFisher's exact test
