# Supplementary material
Source: Research Square preprint supplement (doi:10.21203/rs.3.rs-9350156/v1)
Supplement: Supplementary file 2 [file 67d00cd8449c72c84b49b8f4.xlsx]

## Sheet: Table 1
Table 3. Clinical and genetic parameters affecting PFS and OS in primary glioblastoma based on TERTp status
Parameters	TERTp mutant				TERTp wild type
	No.of patients	PFS	OS		No.of patients	PFS	OS
	(n = 70)	Median P*	Median P*		(n = 42)	Median P*	Median P*
		(months)	(months)			(months)	(months)
	70	7	20		42	6	20
Sex
Female	32	8	26		20	4	18
Male	38	6 0.027	17 0.108		22	7 0.503	25 0.521
Age at diagnosis
<65 years	27	7	21		21	8	24
>65 years	43	7 0.585	20 0.433		21	5 0.350	20 0.163
Preoperative KPS
>80	51	7	21		20	7	23
<80	19	7 0.649	13 0.514		22	5 1.000	19 0.442
RANO
Class 1, 2A	36	9	27		15	8	24
Class 2B, 3	34	5 0.012	15 0.003		27	5 0.265	20 0.391
Ki67 labeling index
Low (<30%)	27	8	24		10	3	24
High (>30%)	42	6 0.767	20 0.917		32	6 0.325	19 0.685
MGMT
Methylated	32	12	26		21	6	18
Unmethylated	38	6 0.010	15 0.010		21	7 0.906	23 0.371
ATRX
loss	7	9	31		14	5	13
retain	63	7 0.612	18 0.256		28	8 0.511	19. 0.816
PDGFR
amp/gain	7	6	18		13	8	18
retain	63	7 0.321	21 0.240		29	5 0.698	20 0.296
EGFR
amp/gain	54	7	20		10	7	19
retain	16	7 0.731	21 0.892		19	5 0.898	23 0.783
CDKN2A
deletion	48	8	21		27	5	15
retain	22	5 0.082	15 0.941		15	16 0.058	33 <0.001
PTEN
deletion	42	8	25		6	3	15
retain	28	6 0.296	15 0.266		36	8 0.123	23 0.275
CDK4
amp/gain	8	9	17		10	7	18
retain	62	7 0.839	20 0.980		32	5 0.909	23 0.830
MDM2
amp/gain	7	8	12		11	4	19
retain	63	7 0.438	21 0.143		31	8 0.536	23 0.601
NFKBIA
deletion	9	8	20		9	16	23
retain	61	7 0.993	21 0.571		33	5 0.897	20 0.332
TP53
hemi	3	11	20		9	16	23
retain	67	7 0.169	21 0.322		33	5 0.622	20 0.44
Abbreviations: PFS, progression-free survival. OS, overall survival. *Log-rank test. P values <0.05 are in bold.
