# Supplementary material
Source: Research Square preprint supplement (doi:10.21203/rs.3.rs-9350156/v1)
Supplement: Supplementary file 3 [file 6817a903c98ab9b0339d6483.xlsx]

## Sheet: Table 1
Table 4. Multivariate analysis of independent prognostic factors associated with PFS and OS
Parameters	PFS	OS
	HR 95% CI P*	HR 95% CI P*
Age
>65 vs. <65	1.1 0.7-1.6 0.744	1.3 0.9-2.1 0.186
RANO resect 1,2A
No vs. yes	1.6 1.1-2.4 0.024	1.9 1.2-2.7 0.008
MGMT
Unmethylated vs. methylated	1.4 1.0-2.2 0.080	1.5 1.0-2.3 0.060
CDKN2A
Deletion vs. Retain	1.1 0.7-1.7 0.590	1.3 1.1-3.0 0.013
P values <0.05 are in bold. N/A not applicable
