# Supplementary material
Source: Research Square preprint supplement (doi:10.21203/rs.3.rs-9350156/v1)
Supplement: Supplementary file 4 [file 9a03dc7aed2150ac8759ea79.xlsx]

## Sheet: Table 1
Table 2. Clinical and genetic parameters affecting PFS and OS in primary glioblastoma
Parameters	No.of patients	PFS	OS
	(n = 112)	Median P*	Median P*
		(months)	(months)
	112	7	20
TERTp status
Mutated	70	7	20
Wild type	42	6 0.502	20 0.548
Sex
Female	52	7	23
Male	60	7 0.327	18 0.455
Age at diagnosis
<65 years	48	7	21
>65 years	64	7 0.689	20 0.139
Preoperative KPS
>80	71	7	21
<80	41	7 0.489	17 0.412
RANO
Class 1, 2A	51	9	27
Class 2B, 3	61	5 0.025	17 0.012
Ki67 labeling index
Low (<30%)	37	8	23
High (>30%)	74	6 0.767	20 0.976
MGMT
Methylated	53	9	24
Unmethylated	59	6 0.130	17 0.237
ATRX
loss	21	5	15
retain	91	7 0.909	18. 0.031
PDGFR
amp/gain	20	7	18
retain	92	7 0.978	21 0.120
EGFR
amp/gain	69	7	20
retain	43	7 0.935	21 0.837
CDKN2A
deletion	75	7	20
retain	37	7 0.625	24 0.015
PTEN
deletion	48	7	24
retain	64	7 0.738	18 0.918
CDK4
amp/gain	18	8	18
retain	94	7 0.778	21 0.677
MDM2
amp/gain	18	5	18
retain	94	7 0.501	21 0.275
NFKBIA
deletion	18	8	20
retain	94	7 0.790	20 0.249
TP53
hemi	12	14	20
retain	100	7 0.173	20 0.948
PFS, progression-free survival. OS, overall survival. *Log-rank test. P values <0.05 are in bold.
