# Supplementary material
Source: Research Square preprint supplement (doi:10.21203/rs.3.rs-9350156/v1)
Supplement: Supplementary file 5 [file dfa84054aa173edd168c0df0.xlsx]

## Sheet: Table 1
Table 5.Multivariate Cox proportional hazards analysis of progression-free survival and overall survival stratified by TERT promoter status
Parameters	TERTp wild type			TERTp mutant
	PFS	OS		PFS	OS
	HR 95% CI P*	HR 95% CI P*		HR 95% CI P*	HR 95% CI P*
Age
>65 vs. <65	1.1 0.5-2.4 0.744	0.9 0.4-2.2 0.877		0.7 0.5-1.2 0.263	1.2 0.7-2.1 0.461
RANO resect 1,2A
No vs. yes	1.3 0.6-2.8 0.487	0.9 0.4-2.3 0.898		2.0 1.2-3.4 0.006	2.2 1.3-3.8 0.004
MGMT
Methylated vs. Unmethylated	0.8 0.4-1.7 0.593	1.3 0.6-2.9 0.497		0.5 0.3-0.8 0.006	0.5 0.3-0.9 0.011
CDKN2A
Deletion vs. Retain	1.9 0.8-4.4 0.133	5.0 1.8-13.7 0.002		0.6 0.3-1.0 0.037	1.1 0.6-1.9 0.807
P values <0.05 are in bold. N/A not applicable
